# Supplementary material for: A Spontaneous, Recurrent Mutation in Divalent Metal Transporter-1 Exposes a Calcium Entry Pathway
Source: PubMed Central journal article supplement (PMC368157; doi:10.1371/journal.pbio.0020050), 2004-03-16
Supplement: pbio.0020050.sg002.pdf [file pbio.0020050.sg002.pdf]

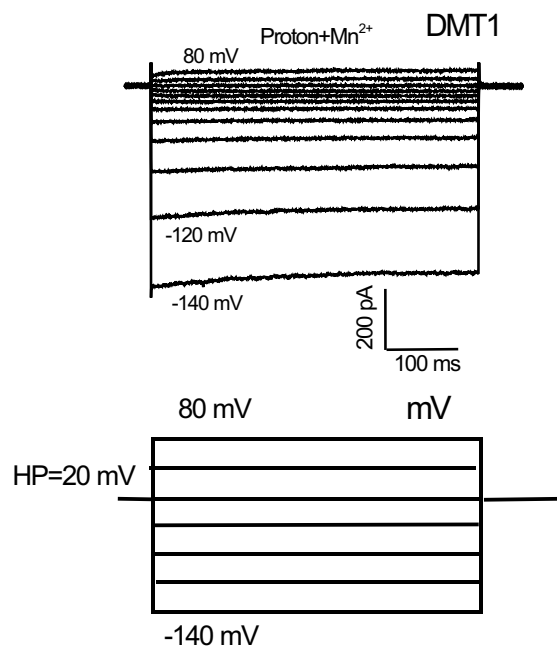

**Supplementary Fig. 2.** Time and voltage-dependent kinetics of H<sup>+</sup>/Mn<sup>2+</sup> current of DMT1. Whole-cell currents were generated by voltage steps from -140 to 80 mV in 20 mV steps, 400ms. The interval between steps was 1000 ms.
