# Supplementary material for: A Spontaneous, Recurrent Mutation in Divalent Metal Transporter-1 Exposes a Calcium Entry Pathway
Source: PubMed Central journal article supplement (PMC368157; doi:10.1371/journal.pbio.0020050), 2004-03-16
Supplement: pbio.0020050.sg003.pdf [file pbio.0020050.sg003.pdf]

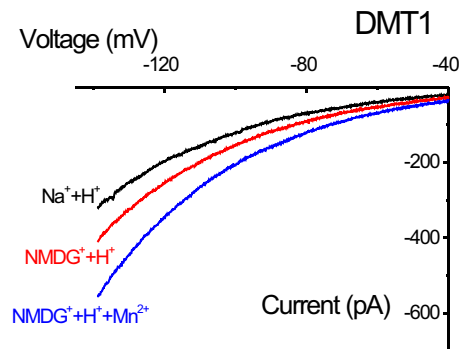

**Supplementary Fig. 3.**  $\text{Na}^+$ -dependence of DMT1  $\text{H}^+$  and  $\text{H}^+/\text{Mn}^{2+}$  currents.

Replacement of extracellular  $\text{Na}^+$  by  $\text{NMDG}^+$  slightly increased the proton current (~20 %) and this was further augmented by adding 300  $\mu\text{M}$   $\text{Mn}^{2+}$ . The concentrations used were:  $\text{Na}^+$  and  $\text{NMDG}^+$ , 140 mM, pH 4.2,  $\text{Mn}^{2+}$ , 300  $\mu\text{M}$ .
